# Supplementary material for: Roaming as the dominant mechanism for molecular products in the photodissociation of large aliphatic aldehydes
Source: Royal Society of Chemistry journal article supplement (doi:10.1039/c5cp03408f), 2015-01-01
Supplement: c5cp03408f1.pdf [file c5cp03408f1.pdf]

## **Supporting Information**

### **Roaming as the Dominant Mechanism for Molecular Products in Photodissociation of Large Aliphatic Aldehydes**

**Po-Yu Tsai,<sup>1</sup> Hou-Kuan Li,<sup>2</sup> Toshio Kasai,<sup>2,3</sup> and King-Chuen Lin<sup>2,\*</sup>**

- 1. Department of Chemistry, National Chung Hsing University, Taichung 402,  
Taiwan**
- 2. Department of Chemistry, National Taiwan University, Taipei 106, and  
Institute of Atomic and Molecular Sciences, Academia Sinica, Taipei 106,  
Taiwan**
- 3. Department of Chemistry, Graduate School of Science, Osaka University,  
Toyonaka, Osaka 560-0043, Japan**

**Pages: 2**

**Figures: 1S**

***A. Tight and Roaming saddle points of 2,2-dimethyl propanal***

The tight and roaming SPs of 2,2-dimethyl propanal ( $\text{CH}_3\text{C}(\text{CH}_3)_2\text{CHO}$ ) are found by using B3LYP /6-311++G(d,p) and CASSCF(6e,6o)/6-311++G(d,p), respectively. The geometries are shown in Fig.1S. The active space of CASSCF calculation includes  $\pi/\pi^*$  of CO,  $\sigma/\sigma^*$  of OC-H and  $\text{HCO}\cdots\text{C}_4\text{H}_9$ . The energy difference between asymptotic radical and roaming SP is calculated at (6e,6o)-MRMP2/6-311++G(d,p) level with the same active space. The HCO and  $\text{C}_4\text{H}_9$  radical fragments are optimized independently via CASSCF(7e,7o)/ 6-311++G(d,p) and CASSCF(3e,3o)/6-311++G(d,p), respectively. The asymptotic MRMP2 energies of the radicals are computed by using the CASSCF optimized radical geometries with the two fragments far separated from each other ( $\sim 100$  Å). The MRMP2/6-311++G(d,p) result (including zero-point energy from CASSCF calculation) shows that the roaming SP is 3 kJ/mol below the asymptotic limit of radical channel.

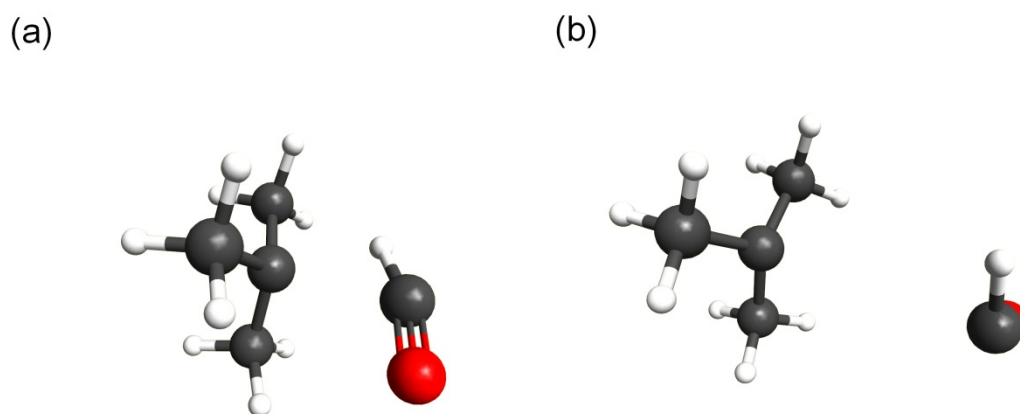

**Fig.1S The geometries of 2,2-dimethyl propanal. (a)tight SP and (b) roaming SP optimized by B3LYP and CASSCF methods, respectively.**
